# Supplementary material
Source: PubMed Central journal article supplement (PMC5292292)
Supplement: NIHMS829858-supplement-supplement_1.pdf [file NIHMS829858-supplement-supplement_1.pdf]

Supplemental Table 1. G protein-coupled estrogen receptor (GPER) and hypoxia inducible factor 1  $\alpha$  (HIF-1 $\alpha$ ) protein staining intensities in control endometrium (CoEM) and eutopic endometrium (EuEM) of endometriosis

|                                 | CoEM (n=20) |         | EuEM (n=20) |         |
|---------------------------------|-------------|---------|-------------|---------|
|                                 | gland       | stromal | gland       | stromal |
| <b>GPER</b>                     |             |         |             |         |
| strong                          | 2 (10)      | 0 (0)   | 12 (60)     | 0 (0)   |
| intermediate                    | 2 (10)      | 1 (5)   | 4 (20)      | 5 (25)  |
| weak                            | 10 (50)     | 3 (15)  | 3 (15)      | 9 (45)  |
| negative                        | 6 (30)      | 16 (80) | 1 (5)       | 6 (30)  |
| <b>HIF-1<math>\alpha</math></b> |             |         |             |         |
| strong                          | 5 (25)      | 2 (10)  | 7 (35)      | 8 (40)  |
| intermediate                    | 4 (20)      | 4 (20)  | 2 (10)      | 4 (20)  |
| weak                            | 7 (35)      | 8 (40)  | 10 (50)     | 4 (20)  |
| negative                        | 4 (20)      | 6 (30)  | 1 (5)       | 4 (20)  |

Values in parentheses are percentages.

Protein levels were assessed by using a semi-quantitative scoring system.
